# Supplementary material
Source: HighWire-hosted journal article supplement (https://fn.bmj.com/content/104/6/F631)
Supplement: inline-supplementary-material-1 [file inline-supplementary-material-1.pdf]

## Supplement 1.

The following predefined outcome measures were collected for each patient: place of birth (inborn or outborn), gestational age, birth weight, small for gestational age defined as birth weight below the 10<sup>th</sup> percentile of the Dutch reference curves(W1), gender, Apgar score at 5 minutes, mode of delivery, multiple pregnancy, prolonged premature rupture of membranes, use of antenatal corticosteroids, maximal respiratory support in the delivery room, mode and duration of respiratory support in the NICU, air leak syndrome, use of postnatal medication, e.g. corticosteroids, exogenous surfactant, caffeine, or doxapram, persistent ductus arteriosus requiring treatment (e.g. indomethacin or surgical ligation), necrotizing enterocolitis  $\geq$  grade 2, culture proven sepsis, brain injury defined as severe intraventricular hemorrhage  $\geq$  grade 3 and/or periventricular leukomalacia  $\geq$  grade 2 and/or post hemorrhagic ventricular dilatation, mortality at 36 weeks postmenstrual age. Having no, mild, moderate or severe bronchopulmonary dysplasia was assessed at 36 weeks postmenstrual age using international criteria(3, W2). ZIP code areas were collected as proxy for socio-economic status(W3).

W1. Visser GH, Eilers PH, Elferink-Stinkens PM, Merkus HM, Wit JM. New Dutch reference curves for birthweight by gestational age. *Early human development*. 2009;**85**:737-44 doi: 10.1016/j.earlhumdev.2009.09.008 [published Online First: 2009/11/17].

W2. van Rossem MC, van de Loo M, Laan BJ, *et al*. Accuracy of the Diagnosis of Bronchopulmonary Dysplasia in a Referral-Based Health Care System. *The Journal of pediatrics*. 2015;**167**:540-4.e1 doi: 10.1016/j.jpeds.2015.05.008 [published Online First: 2015/06/07].

W3. de Graaf JP, Ravelli AC, de Haan MA, Steegers EA, Bonsel GJ. Living in deprived urban districts increases perinatal health inequalities. *The journal of maternal-fetal & neonatal medicine : the official journal of the European Association of Perinatal Medicine, the Federation of Asia and Oceania Perinatal Societies, the International Society of Perinatal Obstet*. 2013;**26**:473-81 doi: 10.3109/14767058.2012.735722 [published Online First: 2012/10/09].
