# Supplementary material
Source: HighWire-hosted journal article supplement (https://fn.bmj.com/content/104/6/F631)
Supplement: inline-supplementary-material-2 [file inline-supplementary-material-2.pdf]

Supplement 2.

Table S2.1 Long term neurodevelopmental outcomes in ventilated and non-ventilated infants.

|                                  | <b>Non-ventilated</b> | <b>Ventilated</b> | <b>p value</b> |
|----------------------------------|-----------------------|-------------------|----------------|
| Mortality to 24 months' CA       | 10 (3.8%)             | 141 (38%)         | <0.01*         |
| Lost to follow up, <i>n</i> (%)  | 38/251 (15.1)         | 34/227 (15%)      | 0.93           |
| Composite cognitive score        | n=204                 | n=184             |                |
| - Below -1SD, <i>n</i> (%)       | 26 (13%)              | 29 (16%)          | 0.40           |
| - Below -2SD, <i>n</i> (%)       | 7 (3%)                | 2 (1%)            | 0.13           |
| Composite motor score            | n=193                 | n=179             |                |
| - Below -1SD, <i>n</i> (%)       | 19 (10%)              | 18 (10%)          | 0.95           |
| - Below -2SD, <i>n</i> (%)       | 9 (5%)                | 4 (2%)            | 0.20           |
| Cerebral palsy, <i>n</i> (%)     | 6/208 (3%)            | 12/193 (6%)       | 0.11           |
| Visual impairment, <i>n</i> (%)  | 0/209                 | 1/188 (0.5%)      | 0.29           |
| Hearing impairment, <i>n</i> (%) | 0/208                 | 3/188 (1.6%)      | 0.07           |
| NDI                              | 31/198 (16%)          | 40/181 (22%)      | 0.11           |

CA: corrected age. IMV only: infants who were mechanically ventilated during admission to the neonatal ward only. NDI: neurodevelopmental impairment, defined as having a composite cognitive score < -1 SD, composite motor score < -1SD, any cerebral palsy, hearing loss despite amplification and/or visual impairment leading to blindness or light perception in one or both eyes.

Table S2.2. Odds ratio (OR) indicating the association between ventilated and non-ventilated infants and the outcome measure in the pooled imputed cohort

|                  | <b>OR</b> | <b>95% CI</b> | <b>p-value</b> |  | <b>aOR<sup>a</sup></b> | <b>95% CI</b> | <b>p-value</b> |  | <b>aOR<sup>b</sup></b> | <b>95% CI</b> | <b>p-value</b> |
|------------------|-----------|---------------|----------------|--|------------------------|---------------|----------------|--|------------------------|---------------|----------------|
| CCS < -1SD       | 1.29      | 0.73, 2.27    | 0.38           |  | 1.03                   | 0.57, 1.87    | 0.91           |  | 1.01                   | 0.55, 1.87    | 0.97           |
| CMS < -1SD       | 1.42      | 0.73, 2.77    | 0.30           |  | 1.12                   | 0.54, 2.33    | 0.77           |  | 1.10                   | 0.51, 2.39    | 0.81           |
| Cerebral palsy   | 1.96      | 0.70, 5.50    | 0.20           |  | 2.88                   | 0.99, 8.38    | 0.05           |  | 3.16                   | 1.04, 2.10    | 0.04*          |
| NDI              | 1.39      | 0.81, 2.27    | 0.19           |  | 1.21                   | 0.73, 2.01    | 0.47           |  | 1.18                   | 0.78, 1.10    | 0.93           |
| Mortality or NDI | 3.97      | 2.70, 5.82    | <0.001         |  | 2.85                   | 1.89, 4.28    | <0.001         |  | 2.27                   | 1.47, 3.51    | <0.001         |

<sup>a</sup>Adjusted for gestational age, small for gestational age and socio-economic status. <sup>b</sup>Adjusted for the variables gestational age, small for gestational age, socio-economic status, necrotizing enterocolitis  $\geq$  grade 2, culture proven sepsis and intraventricular hemorrhage  $\geq$  grade 3. CCS: composite cognitive score. CMS: composite motor score. NDI: neurodevelopmental impairment defined as having a CCS < -1 SD, CMS < -1SD, a cerebral palsy (CP), hearing loss despite amplification and/or visual impairment leading to blindness or light perception in one or both eyes. Mortality or NDI: combined outcome measure mortality or NDI. \*Significant association.
